# Supplementary material for: Ajwain-assisted synthesis of oxalipalladium nanoparticles for colorectal cancer treatment: enhanced anticancer activity and protein interaction profiling
Source: Royal Society of Chemistry journal article supplement (doi:10.1039/d4nj02391a), 2024-01-01
Supplement: d4nj02391a1.pdf [file d4nj02391a1.pdf]

## Supplementary Information:

# Ajwain-Assisted Synthesis of Oxalipalladium Nanoparticles for Colorectal Cancer Treatment: Enhanced Anticancer Activity and Protein Interaction Profiling

Fatemeh Goli<sup>1</sup>, Adeleh Divsalar<sup>1\*</sup>, Milad Rasouli<sup>2,3\*</sup>, and Hamid Gholami<sup>4</sup>

<sup>1</sup> *Department of Cell and Molecular Sciences, Faculty of Biological Sciences, Kharazmi University, Tehran, Iran*

<sup>2</sup> *Endocrinology and Metabolism Research Center, Tehran University of Medical Sciences, Tehran, Iran*

<sup>3</sup> *Department of Physics, Kharazmi University, Tehran, Iran*

<sup>4</sup> *Department of Biochemistry, School of Medicine, Hamadan University of Medical Sciences, Hamadan, Iran*

Correspondence: [divsalar@khu.ac.ir](mailto:divsalar@khu.ac.ir) and [miladrasouli@outlook.com](mailto:miladrasouli@outlook.com)

**Figures:**

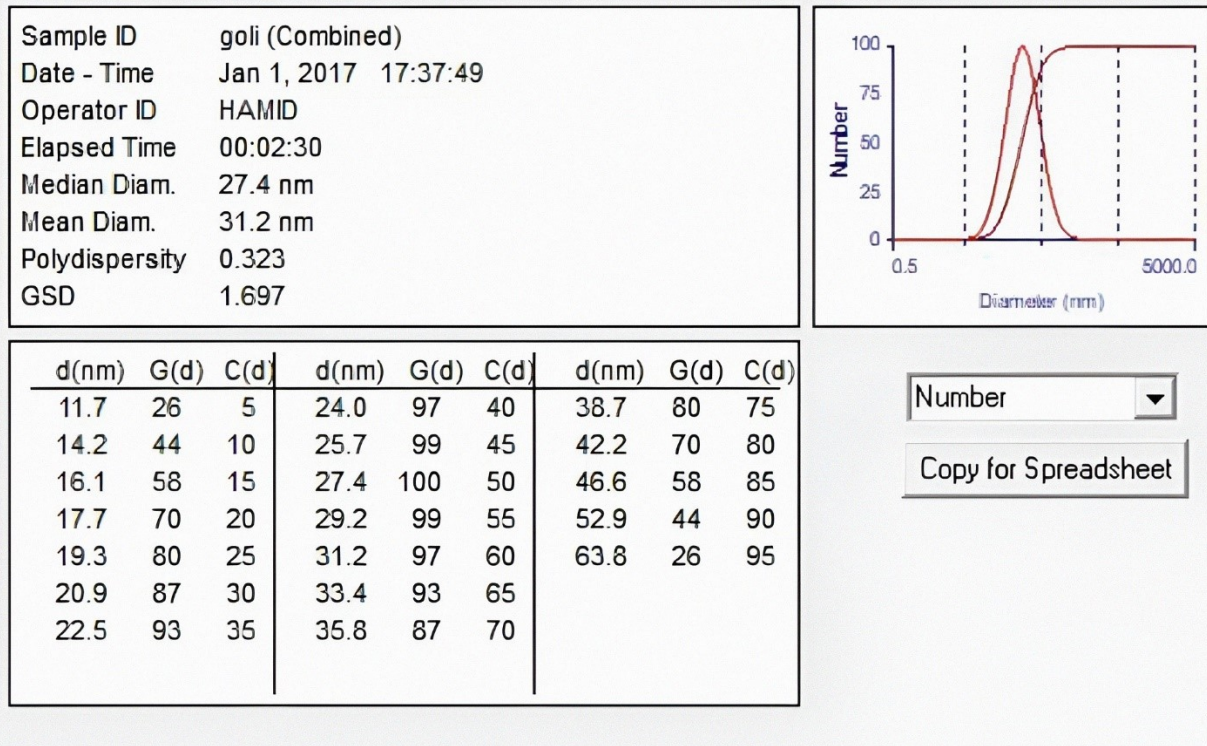

**Figure S1.** Representative particle size distribution using DLS of OX-NPs at 50 ° C.

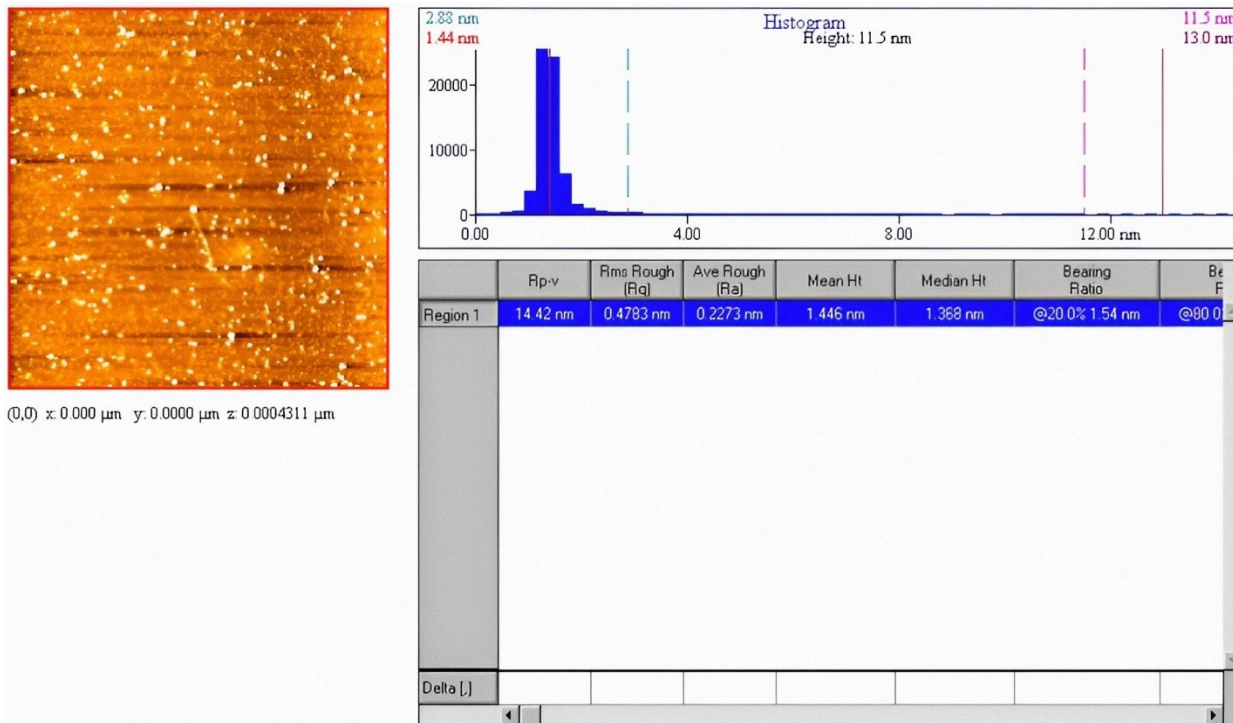

zenyan (Combined)  
 Measurement Completed  
 Runs Completed: 3

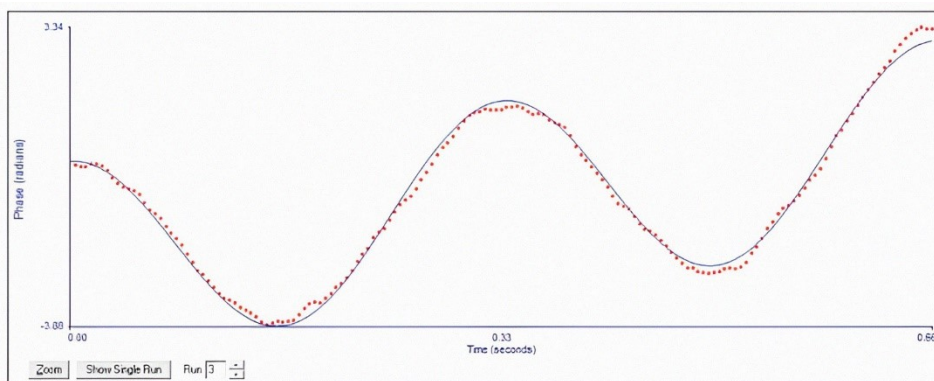

| Run       | Mobility | Zeta Potential (mV) | Rel. Residual |
|-----------|----------|---------------------|---------------|
| 1         | -1.91    | -24.44              | 0.0274        |
| 2         | -2.04    | -25.07              | 0.0275        |
| 3         | -2.20    | -26.21              | 0.0138        |
| Mean      | -2.05    | -26.24              | 0.0229        |
| Std Error | 0.09     | 1.09                | 0.0045        |
| Combined  | -2.04    | -26.14              | 0.0112        |

Buttons: Start, Run, Hide Graph, Clear, Parameters, Copy To Clipboard

Figure S2. Representative of zeta potential using DLS of OX-NPs at temperatures of 50 ° C.

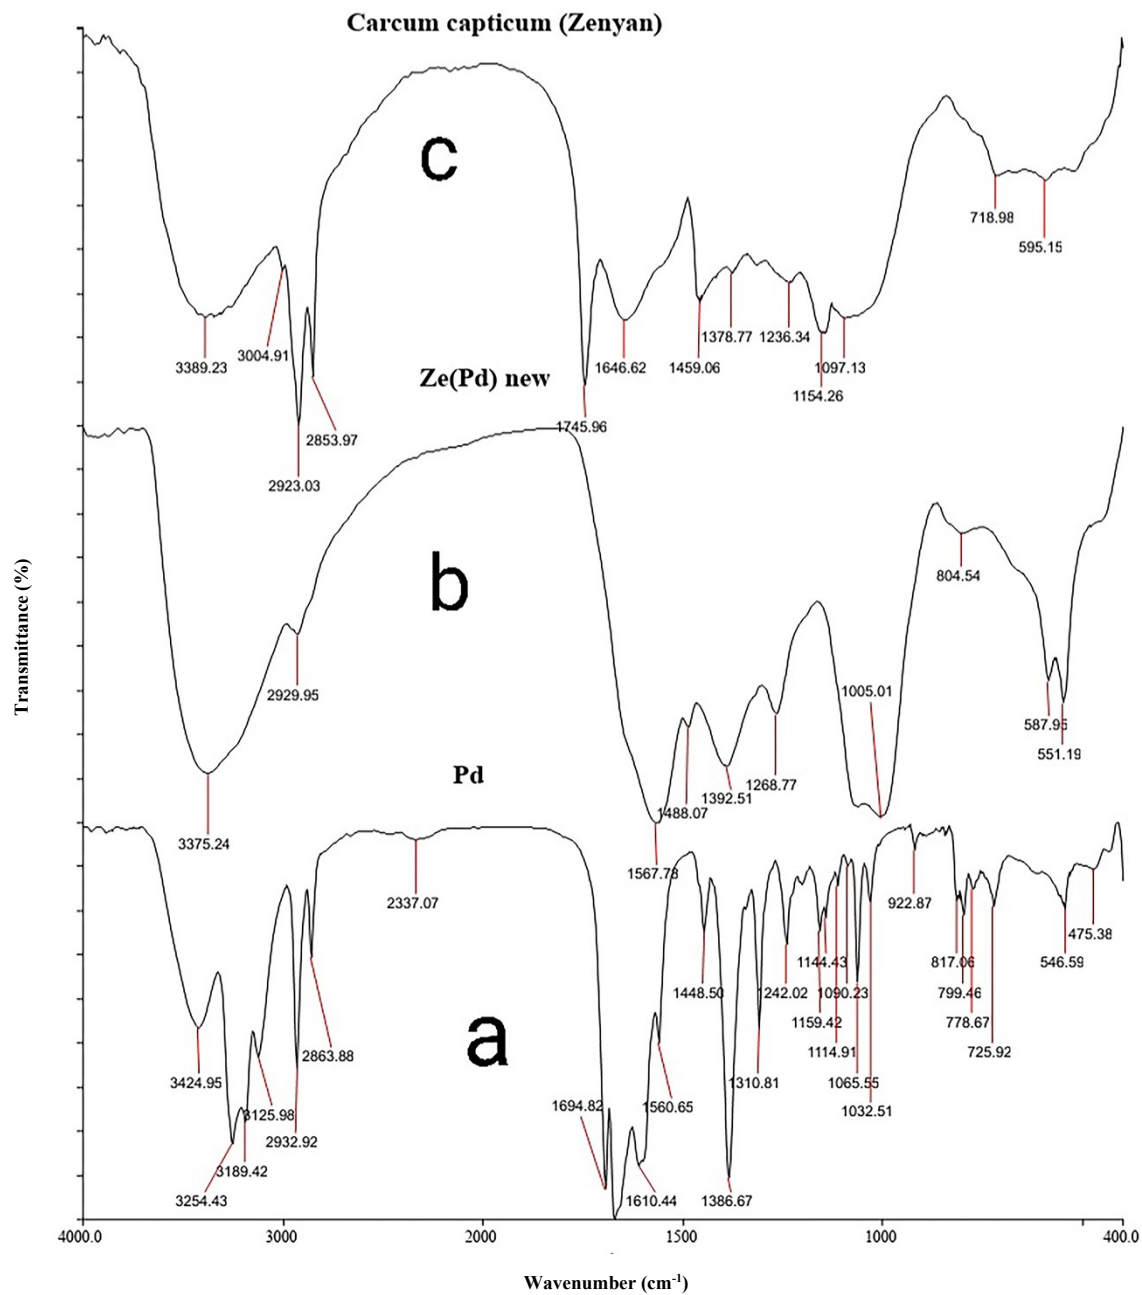

**Figure S3.** FTIR spectra of (a) OX 2 mM, (b) OX-NPs, and (c) Ajwain extract.
